# Supplementary material for: Synthesis of porous MnO2 hierarchical structures through controlled precursor adsorption
Source: Royal Society of Chemistry journal article supplement (doi:10.1039/c1ce05783a), 2011-01-01
Supplement: c1ce05783a.pdf [file c1ce05783a.pdf]

## Supporting Information

# Synthesis of Porous MnO<sub>2</sub> Hierarchical Structures Through Controlled Precursor Adsorption

Shengtao Xing, Riri Han, Zichuan Ma\*, Yinsu Wu, Zicheng Zhou

*College of Chemistry and Material Sciences, Hebei Normal University, Shijiazhuang 050016, PR China*

E-mail: ma\_zichuan@163.com

### Experimental Section

*Materials Synthesis.* The pH of the MnSO<sub>4</sub>·H<sub>2</sub>O (100 mL, 7 mM) and KMnO<sub>4</sub> (100 mL, 5 mM) solution was adjusted to 1-3 by addition of a 5 M H<sub>2</sub>SO<sub>4</sub> solution. One of the two solutions was added dropwise into the other solution whilst stirring at a fix dripping speed. The products were collected by centrifugation, then washed with distilled water for several times, and finally dried overnight at 60 °C.

*Materials Characterizations.* Phase identification was carried out by X-ray diffraction in a Bruker D8-ADVANCE using Cu K $\alpha$  radiation. The morphologies were studied by scanning electron microscope (Hitachi, S-4800) and transmission electron microscope (Hitachi, H-7500) at 100 kV. The HRTEM and SAED analysis was performed by a JEM-2010 high-resolution transmission electron microscope at 200 kV. The specific surface area was evaluated by nitrogen adsorption-desorption isotherm measurements at 77 K (Micromeritics ASAP2020).

*Adsorption experiment.* The adsorption of MnO<sub>4</sub><sup>-</sup> on MnO<sub>2</sub> was studied using batch tests. The solution pH was adjusted from 1 to 6 by adding dilute NaOH, H<sub>2</sub>SO<sub>4</sub> or H<sub>3</sub>PO<sub>4</sub> solution. The adsorbent dosage was 0.5 g/L and the initial MnO<sub>4</sub><sup>-</sup> concentration was 50 mg/L.

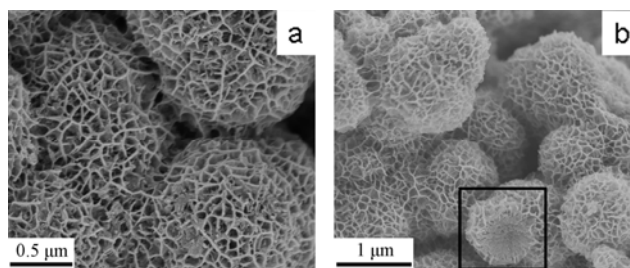

**Figure S1.** low-magnification SEM images of samples prepared in addition mode I (a) and in addition mode II (b) at pH 1.

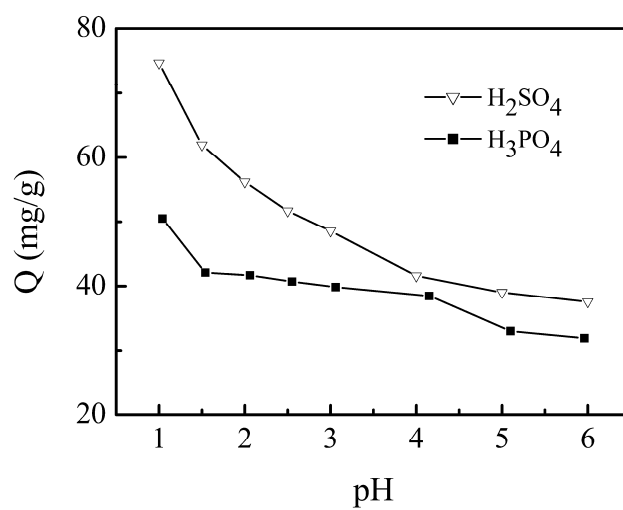

**Figure S2.** Effect of pH on the adsorption of  $\text{MnO}_4^-$  anions on  $\text{MnO}_2$ .
